# Supplementary material
Source: MDPI journal article supplement (https://www.mdpi.com/2073-4441/14/2/208)
Supplement: s1 [file s1]

# Supplementary Material

**Table S1.** Environmental watering volumes (ML) used (held and planned environmental water) between 2007-08 and 2020-21. Note: at the time of writing, 2020-21 data for each catchment was not available, only CEWO net total use and total environmental water use, from DAWE (2021).

| Catchment                                  | 2007-08 |                     | 2008-09 |        |                     | 2009-10 |         |                     | 2010-11   |         |         | 2011-12   |         |         | 2012-13   |         |         | 2013-14   |         |         |
|--------------------------------------------|---------|---------------------|---------|--------|---------------------|---------|---------|---------------------|-----------|---------|---------|-----------|---------|---------|-----------|---------|---------|-----------|---------|---------|
|                                            | State   | Others <sup>1</sup> | CEWH    | State  | Others <sup>2</sup> | CEWH    | State   | Others <sup>3</sup> | CEWH      | State   | Others  |
| Warrego                                    | 0       |                     | 0       | 0      | 0                   | 16,620  | 0       | 0                   | 16,000    | 0       | 0       | 33,880    | 0       | 0       | 0         | 0       | 0       | 506       | 0       | 0       |
| Condamine-Balonne                          | 0       |                     | 0       | 0      | 0                   | 0       | 0       | 0                   | 0         | 0       | 0       | 3,060     | 0       | 0       | 64,946    | 0       | 0       | 22,282    | 0       | 0       |
| Moonie                                     | 0       |                     | 0       | 0      | 0                   | 1,420   | 0       | 0                   | 0         | 0       | 0       | 1,400     | 0       | 0       | 1,415     | 0       | 0       | 1,000     | 0       | 0       |
| Border Rivers                              | 0       |                     | 0       | 0      | 0                   | 0       | 0       | 0                   | 0         | 0       | 0       | 1,000     | 0       | 0       | 2,558     | 4,000   | 0       | 4,000     | 12,907  | 0       |
| Gwydir                                     | 0       |                     | 0       | 0      | 0                   | 0       | 70      | 0                   | 13,056    | 4,727   | 5,000   | 1,206     | 592     | 16,500  | 27,709    | 20,365  | 3,074   | 31,915    | 0       | 1,000   |
| Namoi                                      | 0       |                     | 0       | 0      | 0                   | 0       | 0       | 0                   | 0         | 0       | 0       | 0         | 0       | 0       | 7,727     | 0       | 0       | 0         | 0       | 0       |
| Macquarie-Castlereagh                      | 1,000   |                     | 0       | 0      | 0                   | 9,300   | 1,050   | 16,000              | 26,888    | 33,322  | 139,101 | 40,000    | 25,251  | 88,229  | 100,000   | 37,718  | 128,063 | 10,000    | 10,985  | 43,675  |
| Barwon-Darling                             | 0       |                     | 0       | 0      | 0                   | 19,000  | 145     | 0                   | 1,100     | 0       | 0       | 0         | 0       | 0       | 25,616    | 0       | 0       | 13,000    | 0       | 0       |
| Lower Darling                              | 0       |                     | 0       | 0      | 0                   | 19,000  | 0       | 0                   | 6,580     | 5,000   | 13,820  | 6,000     | 0       | 0       | 0         | 0       | 0       | 47,000    | 8,243   | 0       |
| <b>Northern Basin total</b>                | 1,000   |                     | 0       | 0      | 0                   | 65,340  | 1,265   | 16,000              | 63,624    | 43,049  | 157,921 | 86,546    | 25,843  | 104,729 | 229,971   | 62,083  | 131,137 | 129,703   | 32,135  | 44,675  |
| Lachlan                                    | 20,000  |                     | 0       | 0      | 0                   | 0       | 0       | 0                   | 6,722     | 3,612   | 0       | 20,159    | 7,329   | 0       | 51,283    | 15,373  | 0       | 22,794    | 329     | 0       |
| Murrumbidgee                               | 0       |                     | 0       | 2,000  | 0                   | 48,740  | 7,406   | 30,372              | 193,347   | 17,540  | 208,288 | 82,979    | 8,415   | 132,003 | 156,000   | 18,204  | 26,787  | 133,280   | 11,144  | 106,398 |
| Central Murray (NSW, VIC)                  | 0       |                     | 0       | 17,200 | 1,300               | 6,000   | 6,816   | 0                   | 19,767    | 169,174 | 418,047 | 101,339   | 226,271 | 241,550 | 186,351   | 34,871  | 5,452   | 117,031   | 90,297  | 92,853  |
| Ovens                                      | 0       |                     | 0       | 0      | 0                   | 50      | 0       | 0                   | 0         | 0       | 0       | 70        | 0       | 0       | 20        | 0       | 0       | 20        | 0       | 0       |
| Goulburn-Broken                            | 3,000   |                     | 0       | 4,000  | 0                   | 0       | 0       | 0                   | 52,024    | 9,000   | 0       | 144,490   | 61,038  | 0       | 242,378   | 3,986   | 50,344  | 255,000   | 33,349  | 64,000  |
| Campaspe                                   | 0       |                     | 0       | 0      | 0                   | 0       | 0       | 0                   | 2,100     | 0       | 0       | 6,532     | 0       | 7,152   | 6,821     | 6,660   | 3,406   | 7,000     | 6,280   | 1,788   |
| Loddon                                     | 0       |                     | 0       | 1,000  | 0                   | 0       | 0       | 0                   | 400       | 0       | 0       | 1,564     | 6,037   | 0       | 2,746     | 10,654  | 0       | 2,775     | 6,593   | 0       |
| Wimmera                                    | 0       |                     | 0       | 0      | 0                   | 0       | 0       | 0                   | 0         | 44,000  | 0       | 0         | 26,815  | 0       | 0         | 319     | 0       | 0         | 19,797  | 16      |
| Lower Murray (SA, NSW, VIC)                | 16,000  |                     | 5,524   | 20,000 | 5,444               | 70,813  | 286,306 | 52,882              | 149,245   | 92,371  | 166,320 | 328,756   | 3,932   | 142,044 | 786,918   | 53,238  | 289,103 | 579,200   | 89,082  | 230,951 |
| <b>Southern Basin total</b>                | 39,000  | 16,522              | 5,524   | 44,200 | 6,744               | 125,603 | 300,528 | 83,254              | 423,605   | 335,697 | 792,655 | 685,889   | 339,837 | 522,749 | 1,432,517 | 143,305 | 375,092 | 1,117,100 | 256,871 | 496,006 |
| <b>MDB total</b>                           | 40,000  | 16,522              | 5,524   | 44,200 | 6,744               | 190,943 | 301,793 | 99,254              | 487,229   | 378,746 | 950,576 | 772,435   | 365,680 | 627,478 | 1,662,488 | 205,388 | 506,229 | 1,246,803 | 289,006 | 540,681 |
| Net total use (CEWO)*                      |         |                     | 13,000  |        |                     | 154,000 |         |                     | 387,000   |         |         | 680,000   |         |         | 1,272,000 |         |         | 982,000   |         |         |
| <b>Grand total all sources</b>             | 56,522  |                     | 56,468  |        |                     | 591,990 |         |                     | 1,816,551 |         |         | 1,765,593 |         |         | 2,374,105 |         |         | 2,076,490 |         |         |
| <b>Grand total with CEWO net total use</b> |         |                     | 63,944  |        |                     | 555,047 |         |                     | 1,716,322 |         |         | 1,673,158 |         |         | 1,983,617 |         |         | 1,811,687 |         |         |

**Table S1 (continued).**

|                                        | 2014-15          |                |                | 2015-16         |                |                | 2016-17         |                |                | 2017-18         |                |                | 2018-19         |                |                | 2019-20         |                |               | 2020-21         |       |        |
|----------------------------------------|------------------|----------------|----------------|-----------------|----------------|----------------|-----------------|----------------|----------------|-----------------|----------------|----------------|-----------------|----------------|----------------|-----------------|----------------|---------------|-----------------|-------|--------|
| Catchment                              | CEWH             | State          | Others         | CEWH            | State          | Others*        | CEWH            | State          | Others         | CEWH            | State          | Others         | CEWH            | State          | Others         | CEWH            | State          | Others        | CEWH            | State | Others |
| Warrego                                | 2,542            | 0              | 0              | 859             | 0              | 0              | 26,980          | 0              | 0              | 3,347           | 0              | 0              | 15,738          | 0              | 0              | 16,200          | 0              | 0             |                 |       |        |
| Condamine-Balonne                      | 17,389           | 0              | 0              | 10,453          | 0              | 0              | 45,762          | 0              | 0              | 3,985           | 0              | 0              | 0               | 0              | 0              | 0               | 0              | 0             |                 |       |        |
| Moonie                                 | 1,415            | 0              | 0              | 201             | 0              | 0              | 1,415           | 0              | 0              | 2,323           | 0              | 0              | 1,022           | 0              | 0              | 4,500           | 0              | 0             |                 |       |        |
| Border Rivers                          | 1,812            | 25,080         | 0              | 1,047           | 0              | 0              | 23,526          | 0              | 0              | 9,116           | 0              | 0              | 7,400           | 0              | 0              | 0               | 0              | 0             |                 |       |        |
| Gwydir                                 | 56,639           | 0              | 29,895         | 8,400           | 100            | 4,750          | 22,847          | 3,000          | 21,000         | 28,290          | 15,748         | 3,000          | 58,150          | 8,338          | 52,000         | 8,500           | 1,900          | 5,600         |                 |       |        |
| Namoi                                  | 0                | 0              | 0              | 0               | 0              | 0              | 9,109           | 0              | 0              | 5,357           | 0              | 0              | 5,500           | 0              | 0              | 0               | 0              | 0             |                 |       |        |
| Macquarie-Castlereagh                  | 10,000           | 6,037          | 17,745         | 14,239          | 4,422          | 36,393         | 54,520          | 8,258          | 26,373         | 50,660          | 19,485         | 64,232         | 45,722          | 24,434         | 51,072         | 3,933           | 650            | 0             |                 |       |        |
| Barwon-Darling                         | 1,761            | 0              | 0              | 3,820           | 0              | 0              | 26,796          | 0              | 0              | 10,600          | 18,000         | 0              | 6,940           | 9,662          | 0              | 0               | 0              | 0             |                 |       |        |
| Lower Darling                          | 0                | 0              | 0              | 3,820           | 180            | 0              | 160,453         | 46,330         | 47,980         | 2,738           | 0              | 23,072         | 0               | 0              | 0              | 0               | 0              | 0             |                 |       |        |
| <b>Northern Basin total</b>            | <b>91,558</b>    | <b>31,117</b>  | <b>47,640</b>  | <b>42,839</b>   | <b>4,702</b>   | <b>41,143</b>  | <b>371,408</b>  | <b>57,588</b>  | <b>95,353</b>  | <b>116,416</b>  | <b>53,233</b>  | <b>90,304</b>  | <b>140,472</b>  | <b>42,434</b>  | <b>103,072</b> | <b>33,133</b>   | <b>2,550</b>   | <b>5,600</b>  |                 |       |        |
| Lachlan                                | 5,000            | 1,471          | 0              | 36,022          | 12,092         | 0              | 29,492          | 6,250          | 5,084          | 35,188          | 2,986          | 17,295         | 18,173          | 8,687          | 9,271          | 31,743          | 9,686          | 0             |                 |       |        |
| Murrumbidgee                           | 152,558          | 68,661         | 74,603         | 108,327         | 15,954         | 103,613        | 241,465         | 45,367         | 243,592        | 179,249         | 16,148         | 74,602         | 62,296          | 117,524        | 16,100         | 47,941          | 3,500          | 26,809        |                 |       |        |
| Central Murray (NSW, VIC)              | 63,062           | 32,332         | 13,955         | 424,513         | 43,740         | 91,737         | 349,177         | 127,286        | 13,118         | 392,996         | 20,358         | 2,044          | 135,611         | 22,311         | 76,998         | 618,850         | 75,765         | 47,456        |                 |       |        |
| Ovens                                  | 70               | 0              | 0              | 70              | 0              | 0              | 70              | 0              | 0              | 123             | 0              | 0              | 123             | 39             | 0              | 50              | 39             | 0             |                 |       |        |
| Goulburn-Broken                        | 244,007          | 31,454         | 54,349         | 220,083         | 13,019         | 27,689         | 182,253         | 27,500         | 20,000         | 299,211         | 42,650         | 77,559         | 227,705         | 26,480         | 26,468         | 339,040         | 75,816         | 0             |                 |       |        |
| Campaspe                               | 5,791            | 22,805         | 2,574          | 3,289           | 10,336         | 889            | 0               | 5,551          | 0              | 6,594           | 17,940         | 5,300          | 3,611           | 16,522         | 3,104          | 3,644           | 16,795         | 365           |                 |       |        |
| Loddon                                 | 2,870            | 11,658         | 0              | 1,477           | 7,235          | 0              | 1,579           | 13,086         | 0              | 3,054           | 15,815         | 0              | 2,636           | 13,703         | 0              | 3,644           | 16,795         | 0             |                 |       |        |
| Wimmera                                | 19,875           | 18,271         | 0              | 0               | 5,000          | 0              | 0               | 10,843         | 0              | 3,108           | 16,639         | 13             | 5,838           | 9,825          | 0              | 1,562           | 10,799         | 0             |                 |       |        |
| Lower Murray (SA, NSW, VIC)            | 626,096          | 86,515         | 180,555        | 821,589         | 58,932         | 146,087        | 650,649         | 143,879        | 552,614        | 909,800         | 92,700         | 84,479         | 561,762         | 51,958         | 96,739         |                 | 20,322         | 5,682         |                 |       |        |
| <b>Southern Basin total</b>            | <b>1,119,329</b> | <b>273,167</b> | <b>326,036</b> | <b>1,615,37</b> | <b>166,308</b> | <b>370,015</b> | <b>1,454,68</b> | <b>379,762</b> | <b>834,408</b> | <b>1,829,32</b> | <b>225,236</b> | <b>261,292</b> | <b>1,017,75</b> | <b>267,049</b> | <b>228,680</b> | <b>1,046,47</b> | <b>229,517</b> | <b>80,312</b> |                 |       |        |
| <b>MDB total</b>                       | <b>1,210,887</b> | <b>304,284</b> | <b>373,676</b> | <b>1,658,20</b> | <b>171,010</b> | <b>411,158</b> | <b>1,826,09</b> | <b>437,350</b> | <b>929,761</b> | <b>1,945,73</b> | <b>278,469</b> | <b>351,596</b> | <b>1,158,22</b> | <b>309,483</b> | <b>331,752</b> | <b>1,079,60</b> | <b>232,067</b> | <b>85,912</b> |                 |       |        |
| Net total use (CEWO)*                  | 1,014,000        |                |                | 1,049,00        |                |                | 1,453,00        |                |                | 1,270,00        |                |                | 853,000         |                |                | 1,198,00        |                |               | 1,376,00        |       |        |
| <b>Grand total all sources</b>         | <b>1,888,847</b> |                |                | <b>2,240,37</b> |                |                | <b>3,193,20</b> |                |                | <b>2,575,80</b> |                |                | <b>1,799,46</b> |                |                | <b>1,397,58</b> |                |               |                 |       |        |
| <b>Grand total with CEWO net total</b> | <b>1,691,960</b> |                |                | <b>1,631,16</b> |                |                | <b>2,820,11</b> |                |                | <b>1,900,06</b> |                |                | <b>1,494,23</b> |                |                | <b>1,515,97</b> |                |               | <b>2,219,35</b> |       |        |

Notes: 2012-13 CEWO data from CEWO (2013). 2013-14 CEWH data from CEWO (2015). 2013-14 State & Others data for NSW valleys and NSW Lower Murray Sites from OEH (2014) pp. 6, 10, 14, 18, 23. 2014-15 CEWO data from LTIM reports: Gawne et al. (2016) Appendix A. 2015-16 CEWO data from Gawne et al. (2017) Appendix A. 2016-17 CEWO data from Hale et al. (2018) Appendix A. 2017-18 CEWO data from Hale et al. (2019) Appendix A. 2018-19 CEWO data from Hale et al. (2020) Appendix A. 2012-13 CEWO freshening flows of 300,000 ML for Murray split 50:50 between Central and Lower Murray (CEWO, 2013, Appendix C). 2015-16 CEWO freshening flows of 7,640 ML from Mungindi to Menindee split 50:50 between Barwon-Darling and Lower Darling (Gawne et al. 2017, Appendix A). 2017-18 NSW data from OEH (2018). Hale et al. (2018) state CEWO delivered 142,444 ML to the Goulburn in 2016-17, but VEWH (2017) report 182,253 ML. Some 28,600 ML was released in the Gwydir Catchment (10,600 from CEWO, 18,000 from NSW) of which 15,350 ML reached the Barwon, so split accordingly (OEH, 2020). Hale et al. (2020) state CEWO delivered 45,722 ML to the Macquarie in 2018-19 but OEH (2020) reported 52,071 ML. \*Figures on 'water delivered' by CEWO 2012-13 to 2018-19, reported by DAWE (n.d.), represent net total use and are lower than those reported as the CEWO total in LTIM reports (by an average of 26%; range 16-37%) because the former represents the volume of environmental water actually released, whereas the LTIM figures include return flows from River Murray tributaries that are available for re-use after they enter the Murray

## Sources of data used to compile Table S1

- CEWO (n.d.) 'Water use in catchments.' Available at <http://www.environment.gov.au/water/cewo/catchment>
- CEWO (2013) Annual Report 2012-13. Commonwealth Environmental Water Office, Canberra.
- CEWO (2015) Monitored Outcomes. Commonwealth Environmental Water Office, Canberra.
- DAWE (2021) About Commonwealth environmental water. Department of Agriculture, Water and the Environment, Canberra. Available at <https://www.environment.gov.au/water/cewo/about-commonwealth-environmental-water>
- DEW (2018) South Australia's River Murray Water for the Environment Report 2017-18. Department for Environment and Water, Adelaide.
- DEW (2020) South Australia's River Murray Water for the Environment Report 2018-19. Department for Environment and Water, Adelaide.
- DEWNR (2014) South Australia's River Murray Environmental Watering Report 2012-13. Department of Environment, Water and Natural Resources, Adelaide.
- DEWNR (2015) South Australia's River Murray Environmental Watering Report 2013-14. Department of Environment, Water and Natural Resources, Adelaide.
- DEWNR (2016) South Australia's River Murray Environmental Watering Report 2014-15. Department of Environment, Water and Natural Resources, Adelaide.
- DEWNR (2017a) South Australia's River Murray Environmental Watering Report 2015-16. Department of Environment, Water and Natural Resources, Adelaide.
- DEWNR (2017b) South Australia's River Murray Environmental Watering Report 2016-17. Department of Environment, Water and Natural Resources, Adelaide.
- DEWNR (2018) South Australia's River Murray Environmental Watering Report 2017-18. Department of Environment, Water and Natural Resources, Adelaide.
- Gawne, B., Hale, J., Brooks, S., Campbell, C., Capon, S., Everingham, P., Grace, M., Guarino, F., Stoffels, R and Stewardson, M. (2016) 2014–15 Basin-scale Evaluation of Commonwealth Environmental Water – Synthesis Report. Murray-Darling Freshwater Research Centre, Wodonga.
- Gawne, B., Hale, J., Brooks, S., Campbell, C., Capon, S., Everingham, P., Grace, M., Guarino, F., Stoffels, R and Stewardson, M. (2017) 2015–16 Basin-scale Evaluation of Commonwealth Environmental Water – Synthesis Report. Murray-Darling Freshwater Research Centre, Wodonga.
- Hale, J., Bond, N., Brooks, S., Capon, S., Grace, M., Guarino, F., Mynott, J., Stoffels, R., Stewardson, M. and Thurgate, N. (2018) 2016–17 Basin-scale Evaluation of Commonwealth Environmental Water – Synthesis Report. La Trobe University, Wodonga.
- Hale, J., Bond, N., Brooks, S., Campbell, C., Capon, S., Grace, M., Guarino, F., King, A., Mynott, J., Stewardson, M. and Thurgate, N. (2019) 2017–18 Basin-scale Evaluation of Commonwealth Environmental Water – Synthesis Report. La Trobe University, Wodonga.
- Hale, J., Bond, N., Brooks, S., Capon, S., Grace, M., Guarino, F., James, C., King, A., McPhan, L., Mynott, J., Stewardson, M. and Thurgate, N. (2020) Murray–Darling Basin Long Term Intervention Monitoring Project, 2018–19 Basin-scale Evaluation of Commonwealth Environmental Water – Synthesis Report. La Trobe University, Wodonga.
- Jensen, A. (2016) Delivery of Environmental Water by Water For Nature Program in the South Australian River Murray Valley 2013-16. Anne E Jensen Environmental Consultant, Adelaide.
- MDBA (2014a) The Living Murray Environmental Water Delivery 2012-13. Murray-Darling Basin Authority, Canberra.
- MDBA (2014b) The Living Murray 2013-14 Environmental Watering Report. Murray-Darling Basin Authority, Canberra.
- MDBA (2016) The Living Murray 2014-15 Environmental Watering Report. Murray-Darling Basin Authority, Canberra.
- MDBA (2018) Icon Site Condition: The Living Murray. Murray-Darling Basin Authority, Canberra.
- OEHS (2014a) Environmental Water Use in New South Wales: Outcomes 2012-13. NSW Office of Environment and Heritage, Sydney.
- OEHS (2014b) Environmental Water Use in New South Wales: Outcomes 2013-14. NSW Office of Environment and Heritage, Sydney.
- OEHS (2015) Environmental Water Use in New South Wales: Outcomes 2014-15. NSW Office of Environment and Heritage, Sydney, pp. 6, 10, 14, 18, 23.
- OEHS (2017) Environmental Water Use in New South Wales: Outcomes 2015-16. NSW Office of Environment and Heritage, Sydney, pp. 6, 10, 14, 18, 23.
- OEHS (2017) Environmental Water Use in New South Wales: Outcomes 2016-17. NSW Office of Environment and Heritage, Sydney, pp. 6, 10, 14, 18, 23.
- OEHS (2018) Use of Water for the Environment in NSW: Outcomes 2017–18. NSW Office of Environment and Heritage, Sydney.
- OEHS (2020) Use of Water for the Environment in NSW: Outcomes 2018–19. NSW Office of Environment and Heritage, Sydney.
- SCBEWC (2018) Water For the Environment Annual Report 2017-18. Southern Connected Basin Environmental Watering Committee. <https://www.mdba.gov.au/publications/mdba-reports/southern-connected-basin-environmental-water-committee-annual-reports>
- VEWH (2013) Reflections – Environmental Watering in Victoria 2012-13. Victorian Environmental Water Holder, Melbourne.
- VEWH (2014) Reflections – Environmental Watering in Victoria 2013-14. Victorian Environmental Water Holder, Melbourne.

VEWH (2015) Reflections – Environmental Watering in Victoria 2014-15. Victorian Environmental Water Holder, Melbourne.

VEWH (2016) Reflections – Environmental Watering in Victoria 2015-16. Victorian Environmental Water Holder, Melbourne.

VEWH (2017) Reflections – Water for the Environment in Victoria 2016-17. Victorian Environmental Water Holder, Melbourne.

VEWH (2019) Reflections – Water for the Environment in Victoria 2017-18. Victorian Environmental Water Holder, Melbourne.

VEWH (2020) Reflections – Water for the Environment in Victoria 2018-19. Victorian Environmental Water Holder, Melbourne.
